# Supplementary material for: Prevalence of Erectile Dysfunction in Patients with Diabetes Mellitus and Its Association with Body Mass Index and Glycated Hemoglobin in Africa: A Systematic Review and Meta-Analysis
Source: Hindawi journal article supplement (doi:10.1155/2020/5148370), 2020-01-18
Supplement: f1 [file 5148370.f1.pdf]

## Methodological quality assessment

### Supplementary file 1: Methodological quality assessment of cross-sectional studies using modified Newcastle - Ottawa Scale (NOS)

| First author              | Criteria                         |             |                  |                                       |                                                  |                                             |                           |                  | Total score (10) |
|---------------------------|----------------------------------|-------------|------------------|---------------------------------------|--------------------------------------------------|---------------------------------------------|---------------------------|------------------|------------------|
|                           | Selection                        |             |                  |                                       | Comparability                                    |                                             | Outcome                   |                  |                  |
|                           | Representativeness of the sample | Sample size | Non – responders | Ascertainment of exposure/risk factor | The study controls for the most important factor | The study control for any additional factor | Assessment of the outcome | Statistical test |                  |
| Balde N etal [44]         | A*                               | B*          | B*               | A*                                    | -                                                | B*                                          | A*                        | A*               | 7                |
| El Saghier EO et al [22]  | B*                               | B*          | A*               | A*                                    | A*                                               | -                                           | A*                        | A*               | 7                |
| Kemp T etal [38]          | A*                               | A*          | A*               | A*                                    | A*                                               | -                                           | A*                        | A*               | 7                |
| Likata GMU etal [45]      | A*                               | B*          | B*               | A*                                    | -                                                | B*                                          | A*                        | A*               | 7                |
| Lokrou A etal [46]        | B*                               | B*          | A*               | A*                                    | A*                                               | -                                           | A*                        | A*               | 7                |
| Mutagaywa RK etal [48]    | B*                               | A*          | A*               | B*                                    | A*                                               | A*                                          | A*                        | A*               | 7                |
| Olarinoye J etal [40]     | A*                               | A*          | A*               | A*                                    | A*                                               | B*                                          | A*                        | A*               | 7                |
| Owiredu WK et al [18]     | B*                               | B*          | A*               | A*                                    | A*                                               | -                                           | A*                        | A*               | 7                |
| Pasipanodya Ian etal [47] | A*                               | A*          | -                | A*                                    | A*                                               | -                                           | A*                        | A*               | 6                |
| Seid A et al. [42]        | A*                               | A*          | A*               | B*                                    | A*                                               | A*                                          | A*                        | A*               | 8                |
| Ugwumba FO etal [41]      | A*                               | B*          | B*               | A*                                    | -                                                | B*                                          | A*                        | A*               | 7                |
| Walle B                   | A*                               | A*          | A*               |                                       | B*                                               | B*                                          | A*                        | A*               | 6                |
| Webb EM etal [39]         | A*                               | A*          | A*               | A*                                    | B*                                               | B*                                          | A*                        | A*               | 8                |

*Note: from each item account point. (Accept the study if total score  $\geq 5$ )*

**Selection:** (Maximum 5 stars)

- 1) Representativeness of the sample: a) Truly representative of the average in the target population. \* (all subjects or random sampling) .b) Somewhat representative of the average in the target population. \* (nonrandom sampling) .c) Selected group of users.d) No description of the sampling strategy.
- 2) Sample size:a) Justified and satisfactory. \*.b) Not justified.
- 3) Non-respondents: a) Comparability between respondents and non-respondents characteristics is established, and the response rate is satisfactory. \*.b) The response rate is unsatisfactory, or the comparability between respondents and non-respondents is unsatisfactory. c) No description of the response rate or the characteristics of the responders and the non-responders.
- 4) Ascertainment of the exposure (risk factor): a) validated measurement tool. \*\*.b) Non-validated measurement tool, but the tool is available or described.\* c) No description of the measurement tool.

**Comparability:** (Maximum 2 stars)

- 1) The subjects in different outcome groups are comparable, based on the study design or analysis. Confounding factors are controlled. a) The study controls for the most important factor (select one). \* b) The study control for any additional factor. \*

**Outcome:** (Maximum 3 stars)

- 1) Assessment of the outcome: a) Independent blind assessment. \*\*,b) Record linkage. \*\*,c) Self report. \*,d) No description.
- 2) Statistical test:a) The statistical test used to analyze the data is clearly described and appropriate, and the measurement of the association is presented, including confidence intervals and the probability level (p value). \*,b) The statistical test is not appropriate, not described or incomplete
